# Supplementary material for: Physical and psychosocial work exposures as risk factors for disability retirement due to a shoulder lesion
Source: PubMed Central journal article supplement — Occup Environ Med. 2019 Sep 17;76(11):793–800. doi: 10.1136/oemed-2019-105974 (PMC6839723; doi:10.1136/oemed-2019-105974), 2019-09-17
Supplement: oemed-2019-105974supp001.pdf [file oemed-2019-105974supp001.pdf]

Supplementary table 1. Background characteristics of receivers of disability retirement due to a shoulder lesion.

|                                         | Men (N=1415) |      | Women (1057) |      |
|-----------------------------------------|--------------|------|--------------|------|
|                                         | N            | %    | N            | %    |
| Age at baseline                         |              |      |              |      |
| 30-39                                   | 11           | 0.9  | 5            | 0.4  |
| 40-44                                   | 19           | 1.3  | 10           | 0.9  |
| 45-49                                   | 183          | 12.9 | 100          | 9.5  |
| 50-54                                   | 653          | 46.1 | 488          | 46.2 |
| 55-59                                   | 549          | 38.8 | 454          | 43.0 |
| Education                               |              |      |              |      |
| Tertiary                                | 76           | 5.3  | 68           | 6.4  |
| Secondary                               | 721          | 51.0 | 530          | 50.1 |
| Primary                                 | 618          | 43.7 | 459          | 43.5 |
| Major occupational group                |              |      |              |      |
| Managers                                | 4            | 0.3  | 10           | 0.9  |
| Professionals                           | 20           | 1.4  | 16           | 1.5  |
| Technicians                             | 86           | 6.1  | 79           | 7.5  |
| Office and customer workers             | 41           | 2.9  | 61           | 5.8  |
| Shop, sales and service workers         | 79           | 5.6  | 378          | 35.8 |
| Agricultural workers                    | 116          | 8.2  | 65           | 6.1  |
| Construction, metal and wood workers    | 603          | 42.6 | 51           | 4.8  |
| Machine operators and assemblers        | 309          | 21.8 | 94           | 8.9  |
| Unskilled manual workers                | 157          | 11.1 | 303          | 28.7 |
| Employment sector                       |              |      |              |      |
| Private                                 | 957          | 67.6 | 475          | 44.9 |
| Public                                  | 209          | 14.8 | 467          | 44.2 |
| Other, including self-employed          | 24.9         | 17.6 | 115          | 10.9 |
| Selected industrial sectors             |              |      |              |      |
| Manufacturing                           | 430          | 30.4 | 170          | 16.1 |
| Transportation and storage              | 161          | 11.4 | 41           | 3.9  |
| Human health and social work activities | 33           | 2.3  | 330          | 31.2 |
| Physical work load factors              |              |      |              |      |
| Physically heavy work                   | 974          | 68.8 | 637          | 60.3 |
| Heavy lifting                           | 574          | 40.6 | 142          | 13.4 |
| Working in a forward bent posture       | 872          | 61.6 | 547          | 51.8 |
| Working with hands above shoulder level | 558          | 39.4 | 209          | 19.8 |
| Work demanding high handgrip forces     | 874          | 61.8 | 214          | 20.2 |
| Psychosocial work-related factors       |              |      |              |      |
| High job demands                        | 645          | 45.6 | 414          | 39.2 |
| Low job control                         | 1073         | 75.8 | 780          | 73.8 |
| Monotonous work                         | 431          | 30.5 | 386          | 36.5 |
