# Supplementary material for: Physical and psychosocial work exposures as risk factors for disability retirement due to a shoulder lesion
Source: PubMed Central journal article supplement — Occup Environ Med. 2019 Sep 17;76(11):793–800. doi: 10.1136/oemed-2019-105974 (PMC6839723; doi:10.1136/oemed-2019-105974), 2019-09-17
Supplement: oemed-2019-105974supp002.pdf [file oemed-2019-105974supp002.pdf]

Supplementary table 2. Associations between physical work load and psychosocial work-related factors and disability retirement due to a shoulder lesion among men and women by educational group. Hazard ratios (HR) and their 95% confidence intervals (CI).

|                                          | Tertiary    |                  | Secondary   |                  | Primary     |                  |
|------------------------------------------|-------------|------------------|-------------|------------------|-------------|------------------|
|                                          | HR          | 95% CI           | HR          | 95% CI           | HR          | 95% CI           |
| <b>Men</b>                               |             |                  |             |                  |             |                  |
| <i>Physical work load factors</i>        |             |                  |             |                  |             |                  |
| Physically heavy work                    | <b>3.58</b> | <b>2.94-4.37</b> | <b>2.69</b> | <b>2.33-3.12</b> | <b>2.57</b> | <b>2.20-3.00</b> |
| Heavy lifting                            | 0.97        | 0.84-1.12        | 0.95        | 0.84-1.08        | 1.07        | 0.94-1.23        |
| Working in a forward bent posture        | 0.90        | 0.76-1.08        | 1.13        | 0.97-1.31        | 1.04        | 0.89-1.21        |
| Working with hands above shoulder level  | <b>1.44</b> | <b>1.26-1.65</b> | <b>1.44</b> | <b>1.27-1.65</b> | <b>1.51</b> | <b>1.33-1.72</b> |
| Work demanding high handgrip forces      | <b>1.48</b> | <b>1.23-1.78</b> | 1.12        | 0.97-1.28        | 1.01        | 0.86-1.18        |
| <i>Psychosocial work-related factors</i> |             |                  |             |                  |             |                  |
| High job demands                         | <b>1.38</b> | <b>1.24-1.53</b> | <b>1.27</b> | <b>1.16-1.39</b> | <b>1.24</b> | <b>1.13-1.36</b> |
| Low job control                          | <b>2.44</b> | <b>2.16-2.76</b> | <b>1.80</b> | <b>1.62-2.01</b> | <b>1.67</b> | <b>1.50-1.87</b> |
| Monotonous work                          | <b>1.58</b> | <b>1.40-1.78</b> | <b>1.48</b> | <b>1.33-1.64</b> | <b>1.42</b> | <b>1.28-1.58</b> |
| <b>Women</b>                             |             |                  |             |                  |             |                  |
| <i>Physical work load factors</i>        |             |                  |             |                  |             |                  |
| Physically heavy work                    | <b>2.14</b> | <b>1.66-2.79</b> | <b>2.69</b> | <b>2.35-3.04</b> | <b>3.01</b> | <b>1.62-3.45</b> |
| Heavy lifting                            | 0.87        | 0.76-0.99        | 0.89        | 0.78-1.02        | 0.87        | 0.76-0.99        |
| Working in a forward bent posture        | 1.23        | 0.96-1.56        | 1.12        | 0.98-1.28        | 1.01        | 0.89-1.16        |
| Working with hands above shoulder level  | 1.28        | 0.98-1.69        | <b>1.23</b> | <b>1.07-1.40</b> | <b>1.22</b> | <b>1.06-1.40</b> |
| Work demanding high handgrip forces      | 0.99        | 0.75-1.31        | <b>1.33</b> | <b>1.17-1.51</b> | <b>1.38</b> | <b>1.21-1.57</b> |
| <i>Psychosocial work-related factors</i> |             |                  |             |                  |             |                  |
| High job demands                         | 0.92        | 0.81-1.05        | <b>1.17</b> | <b>1.06-1.30</b> | 1.07        | 0.97-1.19        |
| Low job control                          | <b>1.80</b> | <b>1.57-2.09</b> | <b>1.49</b> | <b>1.33-1.68</b> | <b>1.51</b> | <b>1.33-1.70</b> |
| Monotonous work                          | <b>2.85</b> | <b>2.47-3.28</b> | <b>1.73</b> | <b>1.54-1.94</b> | <b>2.09</b> | <b>1.86-2.34</b> |

HRs are adjusted for age and each work-related factor within the group (either physical or psychosocial). The reference category for each work-related factor consists of the non-exposed.
