# Supplementary material for: Physical and psychosocial work exposures as risk factors for disability retirement due to a shoulder lesion
Source: PubMed Central journal article supplement — Occup Environ Med. 2019 Sep 17;76(11):793–800. doi: 10.1136/oemed-2019-105974 (PMC6839723; doi:10.1136/oemed-2019-105974), 2019-09-17
Supplement: oemed-2019-105974supp003.pdf [file oemed-2019-105974supp003.pdf]

Supplementary table 3. Associations between physical work load and psychosocial work-related factors and disability retirement due to a shoulder lesion among men and women by employment sector. Hazard ratios (HR) and their 95% confidence intervals (CI).

|                                          | Private sector  |                  | Public sector |                  | Other <sup>1</sup> |                  |
|------------------------------------------|-----------------|------------------|---------------|------------------|--------------------|------------------|
|                                          | HR <sup>2</sup> | 95% CI           | HR            | 95% CI           | HR                 | 95% CI           |
| <b>Men</b>                               |                 |                  |               |                  |                    |                  |
| <i>Physical work load factors</i>        |                 |                  |               |                  |                    |                  |
| Physically heavy work                    | <b>1.89</b>     | <b>1.53-2.34</b> | <b>2.43</b>   | <b>1.61-3.66</b> | <b>0.83</b>        | <b>0.45-1.56</b> |
| Heavy lifting                            | <b>1.30</b>     | <b>1.09-1.54</b> | 1.52          | 0.97-2.40        | 1.21               | 0.72-2.03        |
| Working in a forward bent posture        | 1.19            | 0.96-1.48        | 1.11          | 0.65-1.90        | 1.32               | 0.66-2.66        |
| Working with hands above shoulder level  | <b>1.52</b>     | <b>1.28-1.82</b> | 1.14          | 0.74-1.75        | <b>1.68</b>        | <b>1.20-2.35</b> |
| Work demanding high handgrip forces      | 0.83            | 0.65-1.05        | 0.91          | 0.55-1.49        | 0.79               | 0.39-1.59        |
| <i>Psychosocial work-related factors</i> |                 |                  |               |                  |                    |                  |
| High job demands                         | <b>1.35</b>     | <b>1.19-1.54</b> | 1.20          | 0.88-1.63        | <b>1.35</b>        | <b>1.02-1.70</b> |
| Low job control                          | <b>1.29</b>     | <b>1.09-1.51</b> | <b>1.49</b>   | <b>1.08-2.07</b> | 0.91               | 0.66-1.24        |
| Monotonous work                          | 1.06            | 0.92-1.22        | 0.94          | 0.64-1.39        | 1.10               | 0.78-1.56        |
| <b>Women</b>                             |                 |                  |               |                  |                    |                  |
| <i>Physical work load factors</i>        |                 |                  |               |                  |                    |                  |
| Physically heavy work                    | <b>2.14</b>     | <b>1.66-2.79</b> | <b>2.04</b>   | <b>1.58-2.64</b> | 1.30               | 0.74-2.29        |
| Heavy lifting                            | 1.10            | 0.77-1.57        | <b>0.69</b>   | <b>0.50-0.96</b> | 0.90               | 0.40-2.00        |
| Working in a forward bent posture        | 1.23            | 0.96-1.56        | 1.27          | 1.00-1.63        | 1.21               | 0.60-2.44        |
| Working with hands above shoulder level  | 1.28            | 0.98-1.69        | 1.01          | 0.60-1.69        | 0.57               | 0.26-1.26        |
| Work demanding high handgrip forces      | 0.99            | 0.75-1.31        | 1.45          | 0.85-2.47        | 0.69               | 0.24-2.01        |
| <i>Psychosocial work-related factors</i> |                 |                  |               |                  |                    |                  |
| High job demands                         | 1.01            | 0.82-1.22        | 0.88          | 0.69-1.11        | 1.15               | 0.75-1.76        |
| Low job control                          | 0.75            | 0.60-0.97        | 0.93          | 0.74-1.17        | 1.17               | 0.74-1.83        |
| Monotonous work                          | <b>2.32</b>     | <b>1.83-2.93</b> | <b>2.41</b>   | <b>1.87-3.10</b> | 1.66               | 0.83-3.31        |

<sup>1</sup>Including self-employed; <sup>2</sup>HRs are adjusted for age, education and each work-related factor within the group (either physical or psychosocial). The reference category for each work-related factor consists of the non-exposed.
