# Supplementary material for: Physical and psychosocial work exposures as risk factors for disability retirement due to a shoulder lesion
Source: PubMed Central journal article supplement — Occup Environ Med. 2019 Sep 17;76(11):793–800. doi: 10.1136/oemed-2019-105974 (PMC6839723; doi:10.1136/oemed-2019-105974), 2019-09-17
Supplement: oemed-2019-105974supp004.pdf [file oemed-2019-105974supp004.pdf]

Supplementary table 4. Prevalence of physical work load factors by different cut-off points used to dichotomize exposure.

|                                         | Men  |      |      |      | Women |      |      |      |
|-----------------------------------------|------|------|------|------|-------|------|------|------|
|                                         | 0.30 | 0.40 | 0.50 | 0.60 | 0.30  | 0.40 | 0.50 | 0.60 |
| Physically heavy work                   | 48.5 | 36.2 | 22.8 | 18.3 | 32.5  | 26.3 | 17.6 | 9.9  |
| Heavy lifting                           | 37.4 | 21.2 | 16.1 | 7.4  | 16.4  | 8.3  | 7.2  | 3.5  |
| Working in a forward bent posture       | 44.6 | 34.7 | 24.5 | 17.6 | 40.5  | 31.7 | 18.3 | 8.9  |
| Working with hands above shoulder level | 20.3 | 18.4 | 11.6 | 10.0 | 18.7  | 9.2  | 4.0  | 3.0  |
| Work demanding high handgrip forces     | 39.4 | 34.1 | 31.1 | 20.8 | 10.1  | 7.0  | 0.5  | 0.3  |
