# Supplementary material for: Physical and psychosocial work exposures as risk factors for disability retirement due to a shoulder lesion
Source: PubMed Central journal article supplement — Occup Environ Med. 2019 Sep 17;76(11):793–800. doi: 10.1136/oemed-2019-105974 (PMC6839723; doi:10.1136/oemed-2019-105974), 2019-09-17
Supplement: oemed-2019-105974supp005.pdf [file oemed-2019-105974supp005.pdf]

Supplementary table 5. Results of sensitivity analyses: associations between physical work load factors and disability retirement due to a shoulder lesion by different cut-off points used to dichotomize exposure. Hazard ratios (HR) and their 95% confidence intervals (CI).

|                                         | Cut-off at 0.40 |                  | Cut-off at 0.50 |                  | Cut-off at 0.60 |                  |
|-----------------------------------------|-----------------|------------------|-----------------|------------------|-----------------|------------------|
|                                         | HR              | 95% CI           | HR              | 95% CI           | HR              | 95% CI           |
| <b>Men</b>                              |                 |                  |                 |                  |                 |                  |
| Physically heavy work                   | <b>1.88</b>     | <b>1.56-2.26</b> | <b>1.45</b>     | <b>1.19-1.76</b> | <b>1.56</b>     | <b>1.29-1.88</b> |
| Heavy lifting                           | 1.14            | 0.98-1.34        | 0.90            | 0.76-1.08        | <b>0.60</b>     | <b>0.47-0.76</b> |
| Working in a forward bent posture       | 1.10            | 0.90-1.34        | 0.95            | 0.78-1.14        | <b>1.47</b>     | <b>1.21-1.80</b> |
| Working with hands above shoulder level | <b>1.60</b>     | <b>1.39-1.84</b> | <b>1.50</b>     | <b>1.31-1.73</b> | <b>1.09</b>     | <b>1.20-1.54</b> |
| Work demanding high handgrip forces     | 0.82            | 0.66-1.02        | <b>1.38</b>     | <b>1.18-1.62</b> | 1.17            | 0.93-1.47        |
| <b>Women</b>                            |                 |                  |                 |                  |                 |                  |
| Physically heavy work                   | <b>2.04</b>     | <b>1.71-2.43</b> | <b>2.26</b>     | <b>1.96-2.59</b> | <b>1.71</b>     | <b>1.44-2.03</b> |
| Heavy lifting                           | <b>0.79</b>     | <b>0.64-0.97</b> | <b>0.56</b>     | <b>0.43-0.73</b> | <b>0.47</b>     | <b>0.30-0.73</b> |
| Working in a forward bent posture       | <b>1.22</b>     | <b>1.03-1.45</b> | 1.18            | 0.98-1.43        | 1.17            | 0.86-1.60        |
| Working with hands above shoulder level | 1.12            | 0.89-1.41        | 0.91            | 0.67-1.23        | 0.94            | 0.65-0.31        |
| Work demanding high handgrip forces     | 1.17            | 0.93-1.49        | <b>2.33</b>     | <b>1.40-3.87</b> | <b>2.22</b>     | <b>1.30-3.80</b> |

HRs are adjusted for age, education and each physical work load factor.
